# Supplementary material for: Ultrathin FeOOH nanosheets as an efficient cocatalyst for photocatalytic water oxidation
Source: Royal Society of Chemistry journal article supplement (doi:10.1039/c9ta01740b), 2019-01-01
Supplement: c9ta01740b1.pdf [file c9ta01740b1.pdf]

## Supporting Information

### **Ultrathin FeOOH Nanosheets as an Efficient Cocatalyst for Photocatalytic Water Oxidation**

Ge Ge,<sup>ab</sup> Min Liu,<sup>ab</sup> Chao Liu,<sup>ab</sup> Wei Zhou,<sup>c</sup> Defa Wang,<sup>ab</sup> Lequan Liu,<sup>\*ab</sup> and Jinhua Ye,<sup>\*abd</sup>

<sup>a</sup>TJU-NIMS International Collaboration Laboratory, Key Lab of Advanced Ceramics and Machining Technology (Ministry of Education) and Tianjin Key Laboratory of Composite and Functional Materials, School of Material Science and Engineering, Tianjin University, 92 Weijin Road, Tianjin, P. R. China.

<sup>b</sup>Collaborative Innovation Center of Chemical Science and Engineering (Tianjin), Tianjin 300072, People's Republic of China.

E-mail: Lequan.Liu@tju.edu.cn

<sup>c</sup>Department of Applied Physics, Tianjin Key Laboratory of Low Dimensional Materials Physics and Preparing Technology, Faculty of Science, Tianjin University, Tianjin 300072, P. R. China.

<sup>d</sup>International Center for Materials Nanoarchitectonics (WPI-MANA), National Institute for Materials Science (NIMS) 1-1 Namiki, Tsukuba, Ibaraki 3050044, Japan.

E-mail: Jinhua.Ye@nims.go.jp

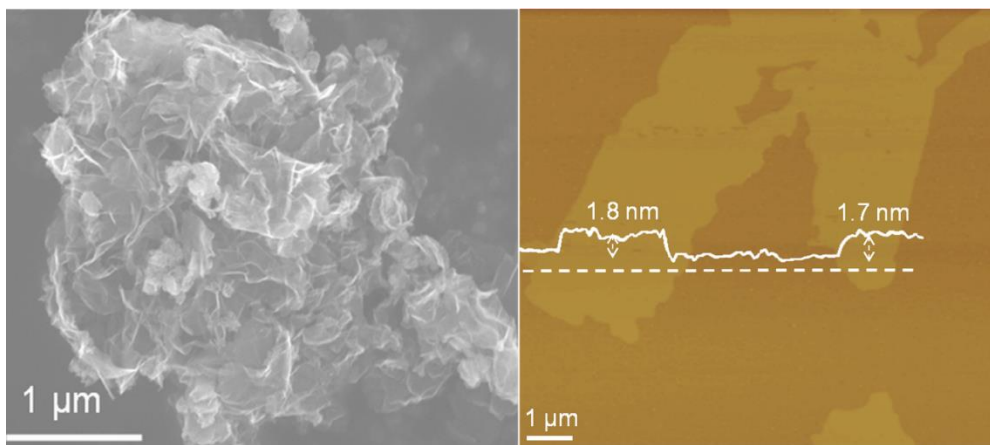

**Fig. S1** SEM and AFM images of ultrathin FeOOH NSs.

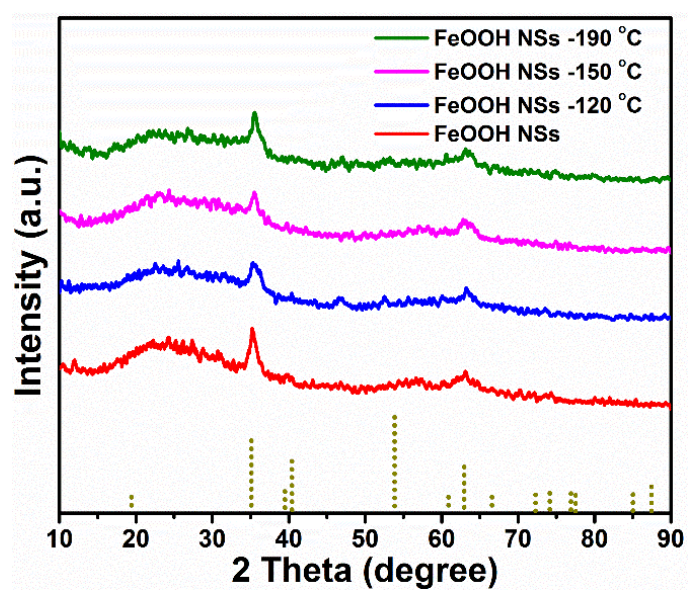

**Fig. S2** XRD patterns of ultrathin FeOOH nanosheets with different heat treatment temperature.

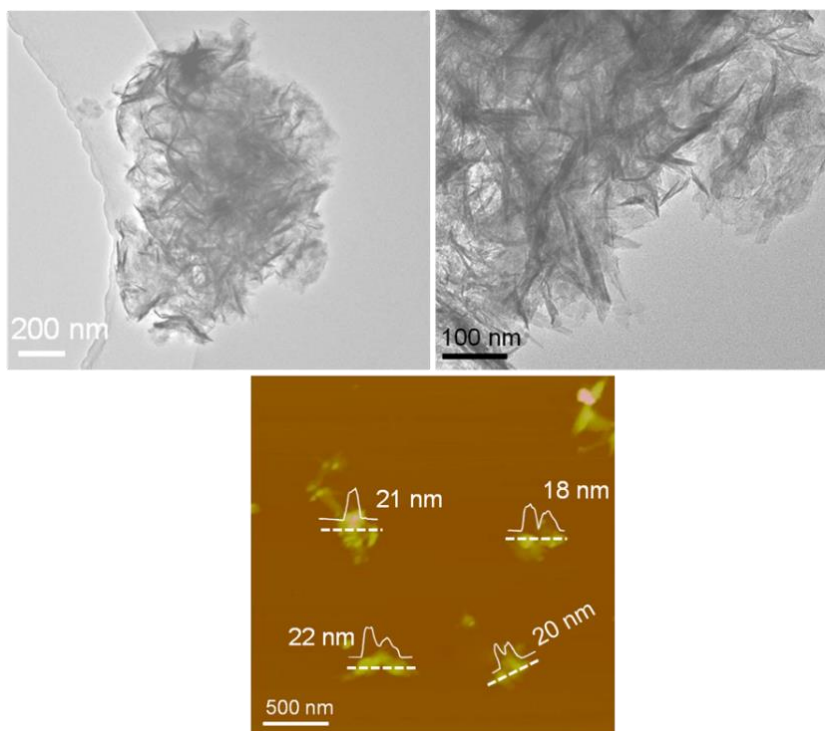

**Fig. S3** TEM and AFM images of FeOOH q-NSs.

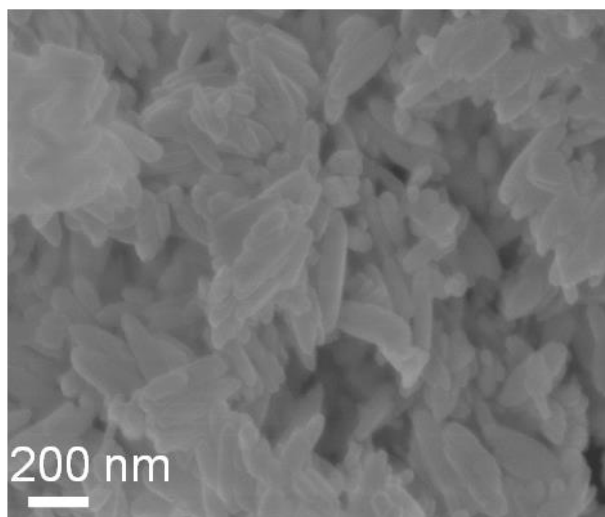

**Fig. S4** SEM image of FeOOH bulk.

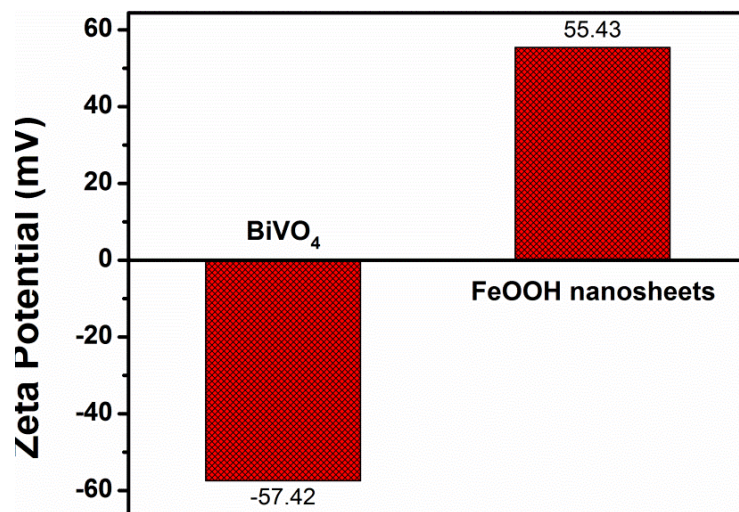

**Fig. S5** Zeta potentials of BiVO<sub>4</sub> and ultrathin FeOOH NSs.

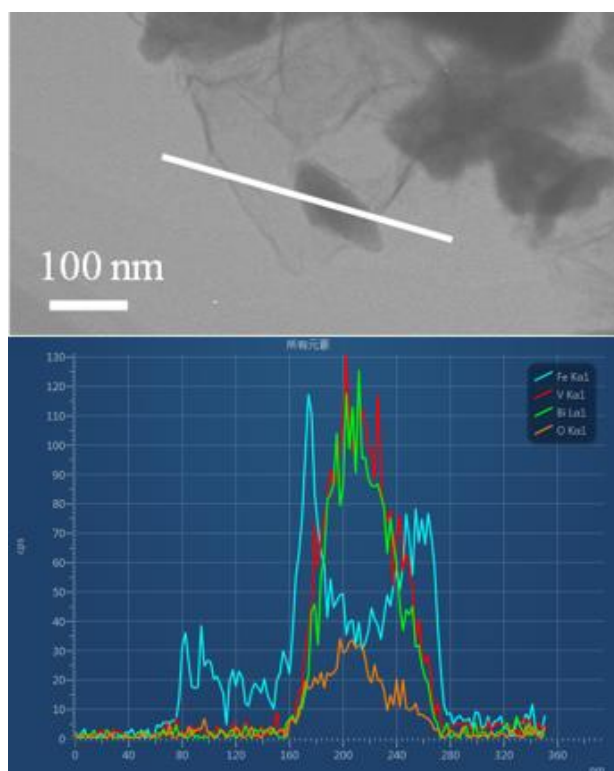

**Fig. S6** EDX line scanning analysis with white line in TEM image showing the element distribution of Bi, V, O and Fe.

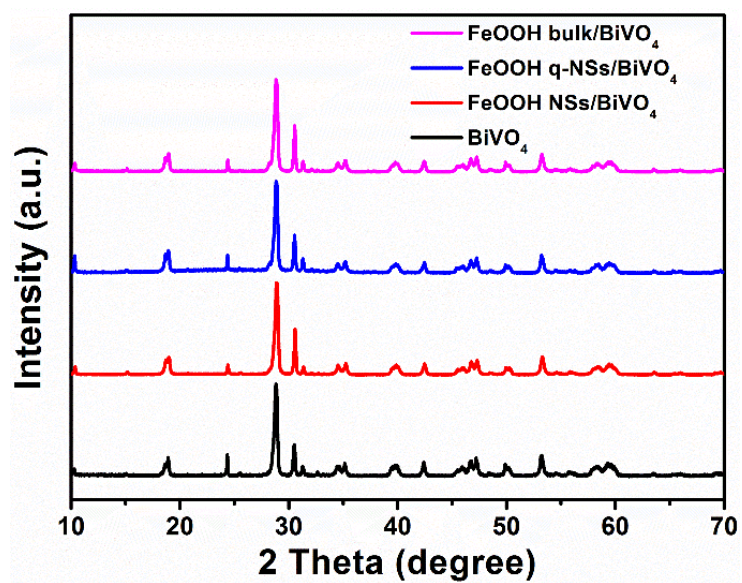

Fig. S7 XRD patterns of  $\text{BiVO}_4$  and  $\text{FeOOH}/\text{BiVO}_4$ .

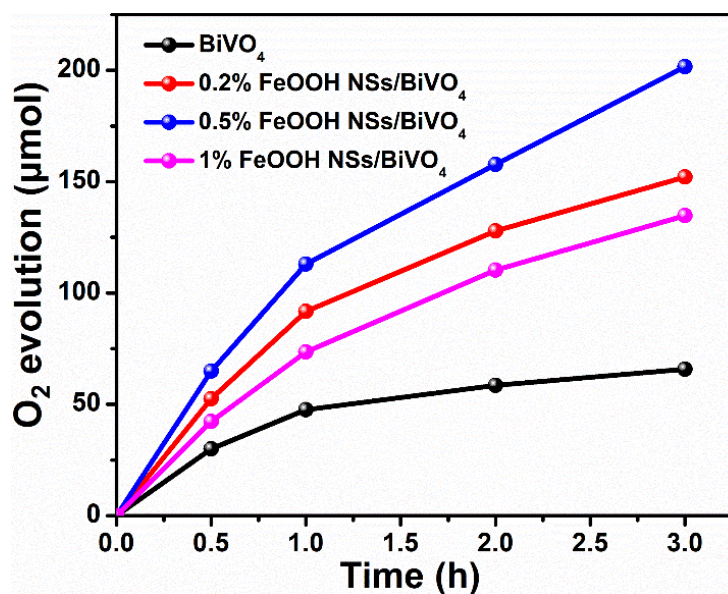

Fig. S8 Curves of visible-light  $\text{O}_2$  evolution as a function of reaction time over  $\text{BiVO}_4$  loaded with different amounts of  $\text{FeOOH NSs}$ .

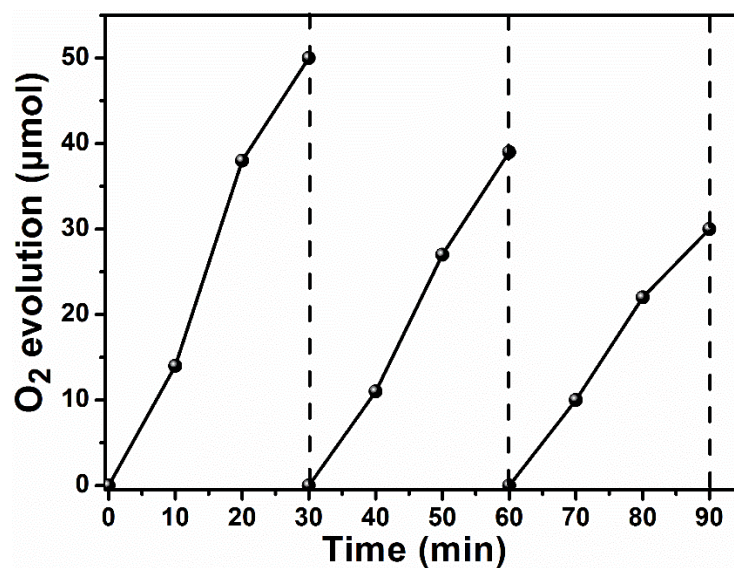

**Fig. S9** Recycling stability of FeOOH NSs/BiVO<sub>4</sub> for photocatalytic oxygen evolution.

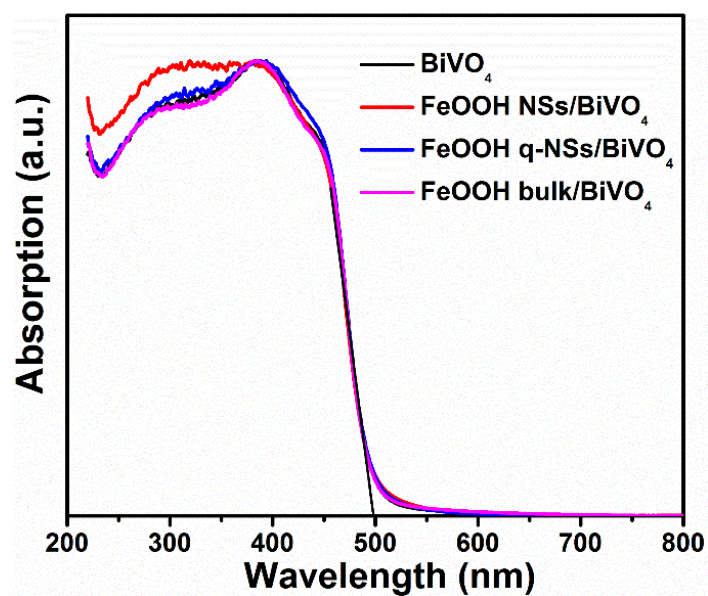

**Fig. S10** UV-vis spectra of BiVO<sub>4</sub> and FeOOH/BiVO<sub>4</sub>.

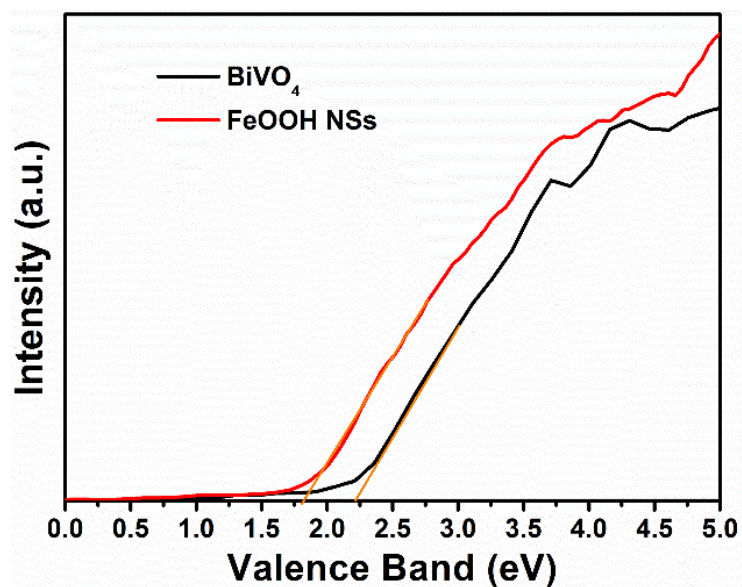

**Fig. S11** Valence band spectra of  $\text{BiVO}_4$  and  $\text{FeOOH}$  NSs.

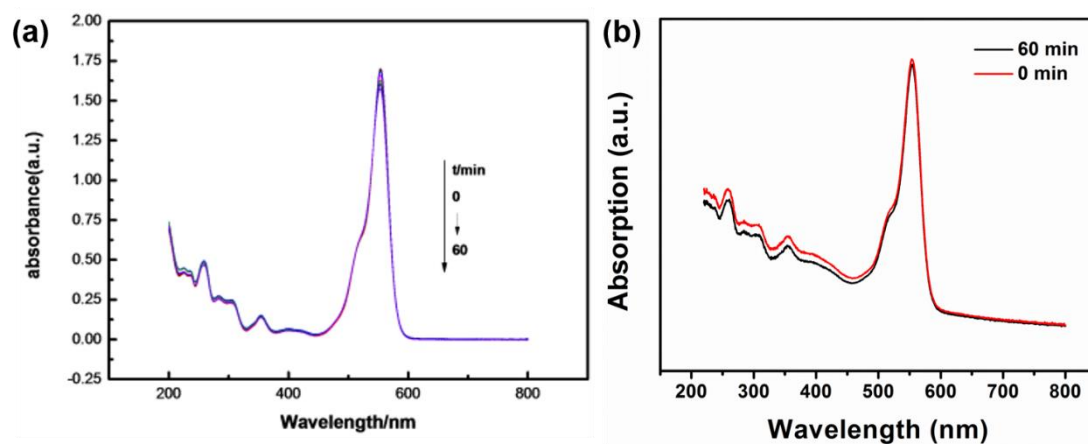

**Fig. S12** (a) UV-vis spectra of RhB as a function of irradiation time without photocatalyst. (b) UV-vis spectra of RhB as a function of irradiation time in the presence of  $\text{FeOOH}$  NSs as a photocatalysts.

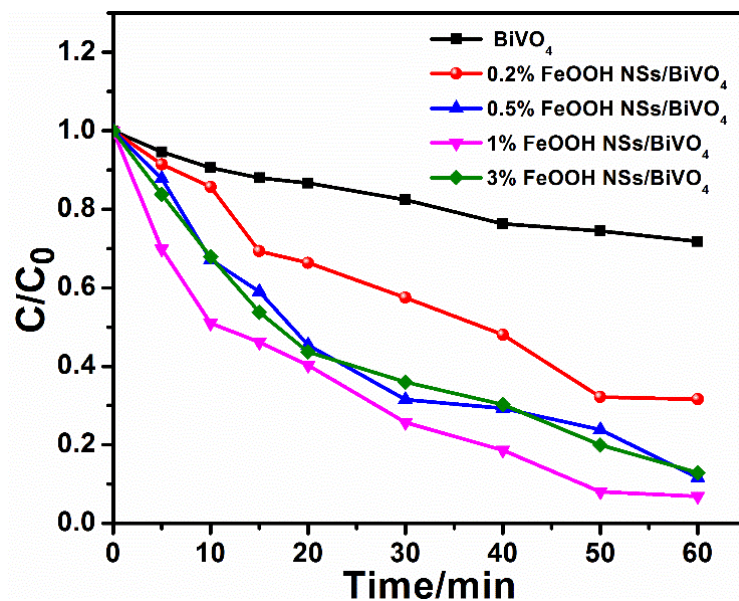

**Fig. S13** Photodegradation of RhB over BiVO<sub>4</sub> with different loading amounts of FeOOH NSs.

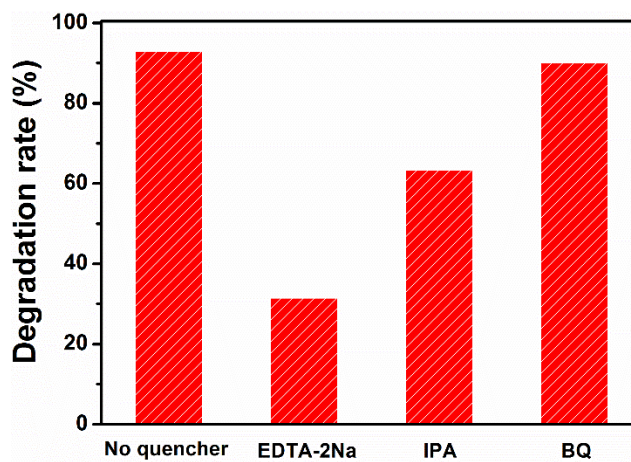

**Fig. S14** Trapping experiment of active species during the photocatalytic degradation of RhB over FeOOH NSs/BiVO<sub>4</sub> under visible-light irradiation.



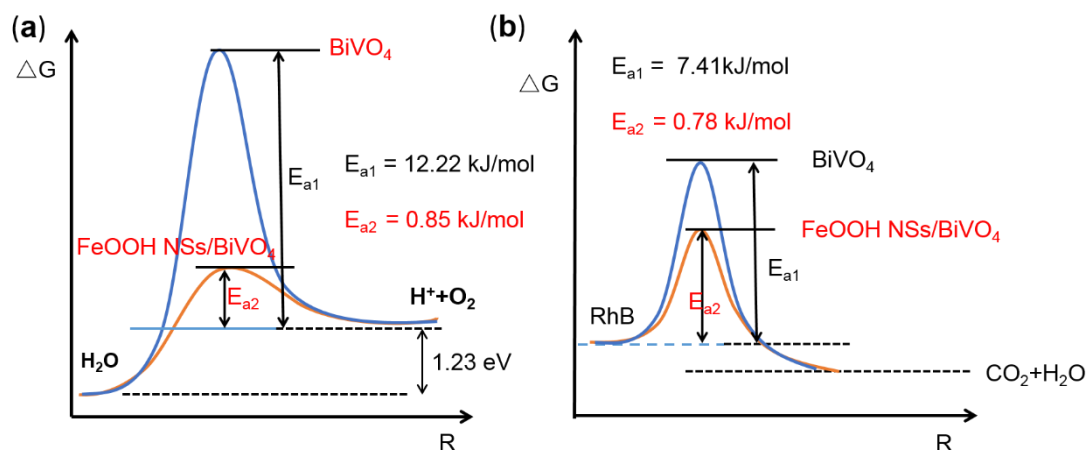

**Fig. S15** (a) The apparent activation energy of O<sub>2</sub> evolution over BiVO<sub>4</sub> and FeOOH NSs/BiVO<sub>4</sub>. (b) The apparent activation energy of the degradation of RhB over BiVO<sub>4</sub> and FeOOH NSs/BiVO<sub>4</sub>.

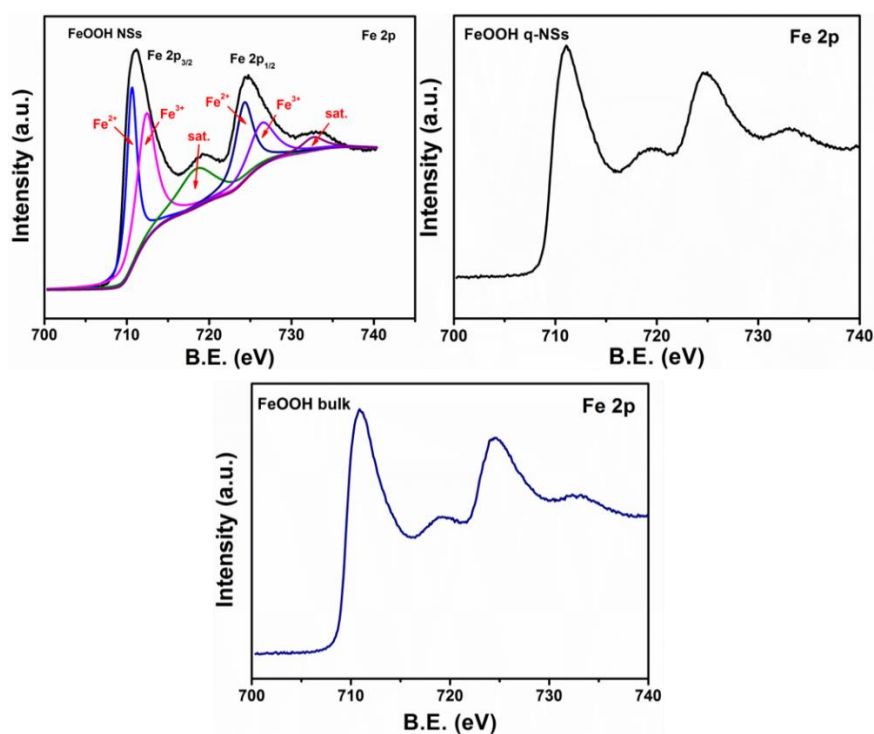

**Fig. S16** XPS high resolution Fe 2p spectra of FeOOH NSs, FeOOH q-NSs and FeOOH bulk.

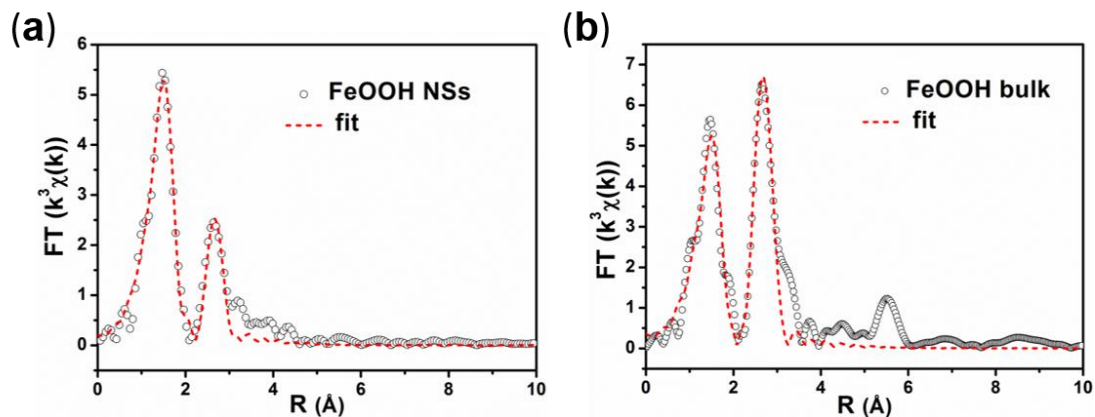

**Fig. S17** EXAFS curves-fitting result of the a) FeOOH NSs and b) FeOOH bulk.

**Table S1.** EXAFS fitting results for the local structure parameters around Fe.

| Sample                    | Path  | $N^a$ | $R$<br>[Å] <sup>b</sup> | $\sigma^2$<br>[10 <sup>-3</sup> Å <sup>-2</sup> ] <sup>c</sup> | $\Delta E_0$<br>[eV] <sup>d</sup> | $R_f$ |
|---------------------------|-------|-------|-------------------------|----------------------------------------------------------------|-----------------------------------|-------|
| $\beta$ -FeOOH<br>theory  | Fe-O  | 6     |                         |                                                                |                                   |       |
|                           | Fe-Fe | 4     |                         |                                                                |                                   |       |
| FeOOH<br>bulk             | Fe-O  | 5.9   | 1.98                    | 11.0                                                           | -6.5                              | 0.018 |
|                           | Fe-Fe | 3.9   | 3.05                    | 7.2                                                            | 2                                 |       |
| $\delta$ -FeOOH<br>theory | Fe-O  | 6     |                         |                                                                |                                   |       |
|                           | Fe-Fe | 2     |                         |                                                                |                                   |       |
| FeOOH<br>NSs              | Fe-O  | 5.4   | 1.97                    | 10.8                                                           | -5.6                              | 0.001 |
|                           | Fe-Fe | 1.6   | 3.04                    | 8.6                                                            | -0.42                             |       |

<sup>a)</sup> coordination number; <sup>b)</sup> distance; <sup>c)</sup> mean-square disorder; <sup>d)</sup> energy shift.

**EXAFS fitting details:** To obtain the quantitative structural parameters around Fe atoms in our samples, least-squares curve parameter fitting was performed using the ARTEMIS module of IFEFFIT software packages.<sup>1</sup> The amplitude reduction factor  $S_0$  was treated as adjustable variable and the obtained value of 0.8 for Fe-foil was fixed in fitting the subsequent Fe edge data for the samples.

The fit was done on the  $k^3$ -weighted EXAFS function  $\chi(k)$  data from 3 to 12.3 Å<sup>-1</sup> in the  $R$ -range of 1.0–3.1 Å. The coordination numbers  $N$ , interatomic distances  $R$ , Debye-Waller factor  $\sigma^2$  and the edge-energy shift  $\Delta E_0$  were allowed to run freely.

1 B. Ravel, M. Newville, *J. Synchrotron Radiat.* **2005**, *12*, 537.

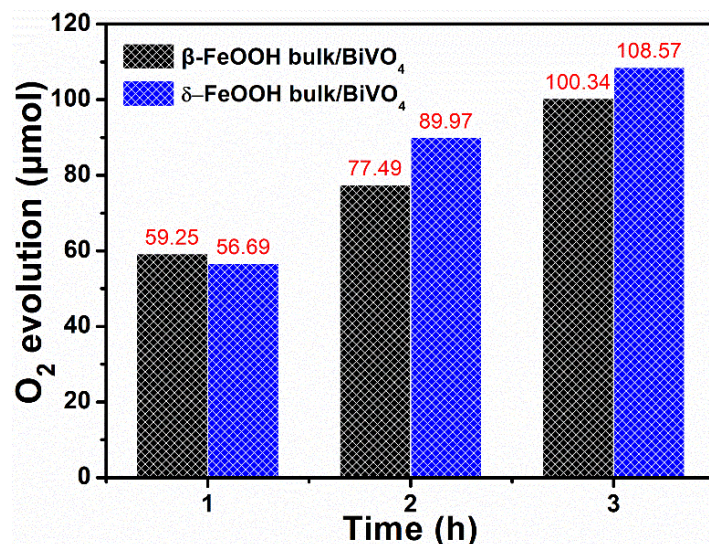

**Fig. S18** Curves of visible-light O<sub>2</sub> evolution as a function of reaction time over  $\beta$ -FeOOH bulk/BiVO<sub>4</sub> and  $\delta$ -FeOOH bulk/BiVO<sub>4</sub>.

$\delta$ -FeOOH bulk was further synthesized in comparison with  $\beta$ -FeOOH bulk. Correspondingly, the  $\delta$ -FeOOH bulk/BiVO<sub>4</sub> sample was also evaluated for photocatalytic O<sub>2</sub> evolutions under visible-light irradiation. Apparently, it was shown that photocatalytic oxygen activity of the two samples was almost the same, although the phases of the two bulk FeOOH were different.

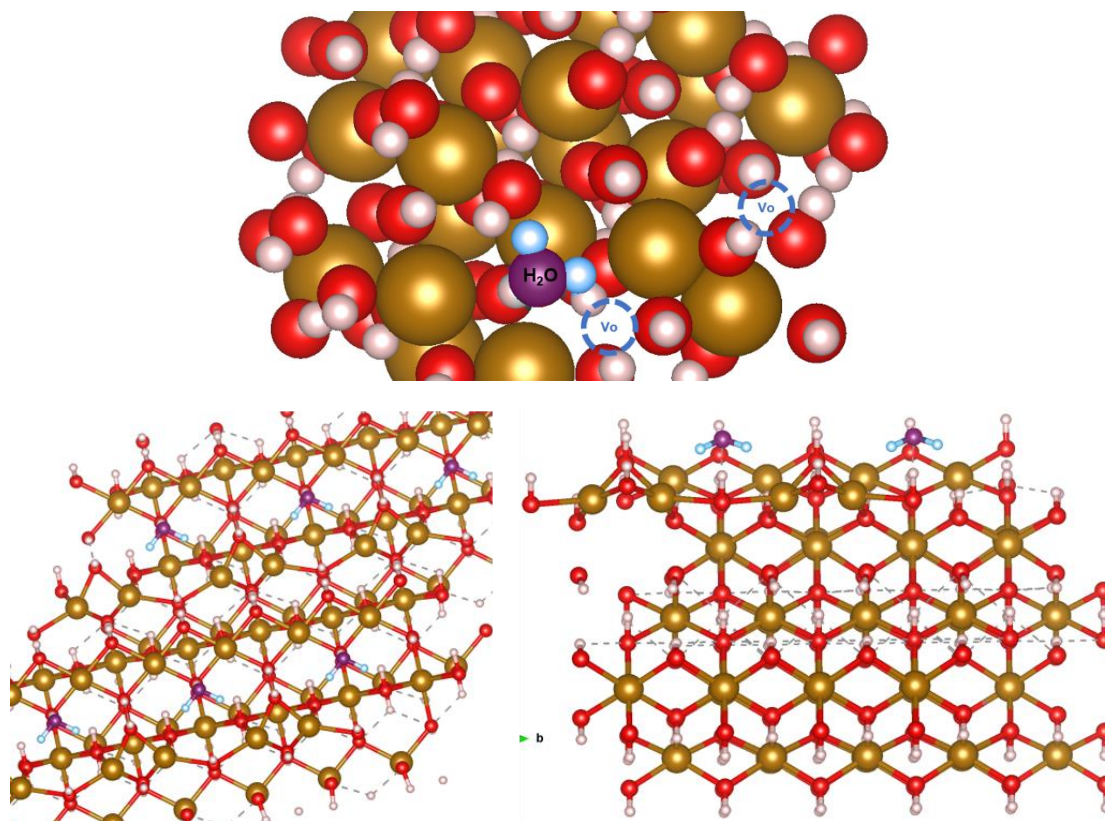

**Fig. S19** Calculated surface atomic configurations for adsorbing water on H sites of ultrathin FeOOH with Vo.
